# Supplementary material for: Antagonistic effects leading to turn-on electrochemiluminescence in thermoresponsive hydrogel films
Source: Royal Society of Chemistry journal article supplement (doi:10.1039/c6cp05688a), 2016-01-01
Supplement: c6cp05688a1.pdf [file c6cp05688a1.pdf]

## Electronic Supplementary Information

### Antagonist Effects Leading to Turn-on Electrochemiluminescence in Thermoresponsive Hydrogel Films

Haidong Li, Milica Sentic, Valérie Ravaine\*, Neso Sojic\*

#### Contents

|                                 |   |
|---------------------------------|---|
| A. Additional figures and table | 1 |
| B. Experimental section         | 4 |
| C. References                   | 5 |

|                       |   |
|-----------------------|---|
| A. Additional figures | 1 |
|-----------------------|---|

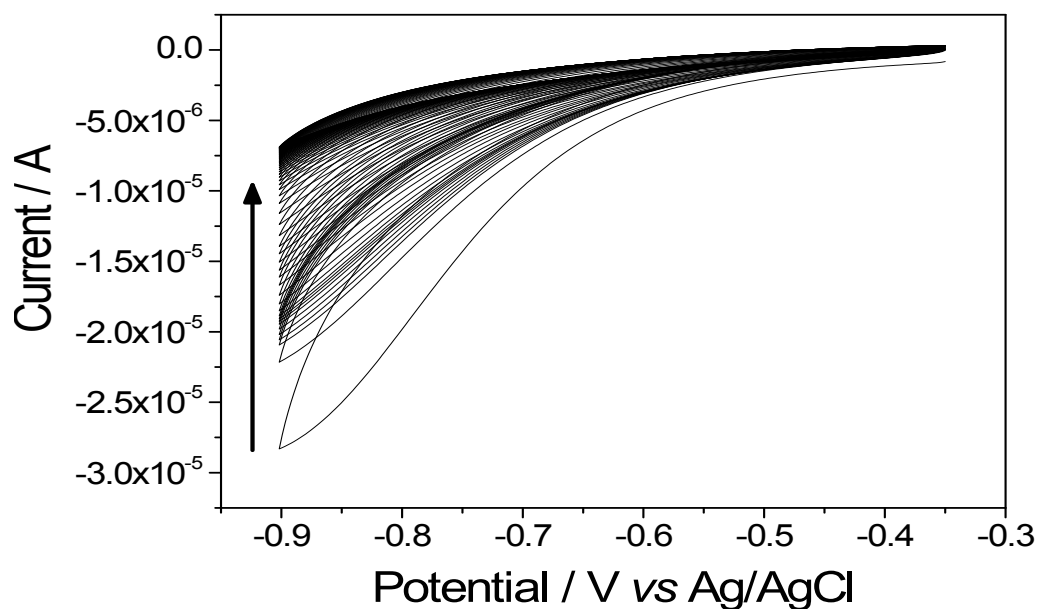

Figure S1. Electrodeposition of a pNIPAM-Ru hydrogel film by cyclic voltammetry. Electrochemically assisted free radical polymerization was performed in a degassed solution containing 70 mM pNIPAM, 0.14 mM Ru(bpy)<sub>3</sub> monomer, 1.5 mM K<sub>2</sub>S<sub>2</sub>O<sub>8</sub>, 1.75 mM BIS and

0.2 M  $\text{KNO}_3$ . The potential was scanned 60 times at a scan rate of  $100 \text{ mV s}^{-1}$  between  $-0.35$  and  $-0.9 \text{ V vs. Ag/AgCl}$ . The arrow indicates the increasing scan number.

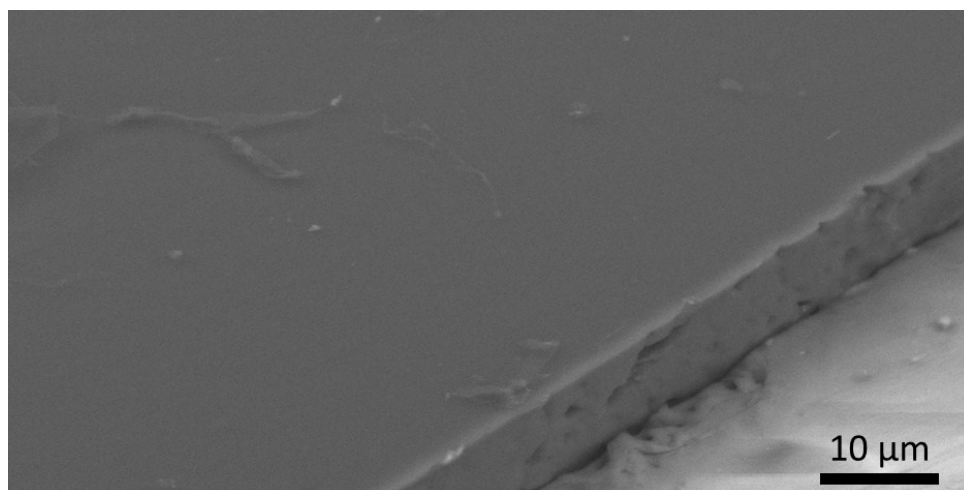

Figure S2. Scanning electron microscopy image of lyophilized hydrogel films on the GC electrode.

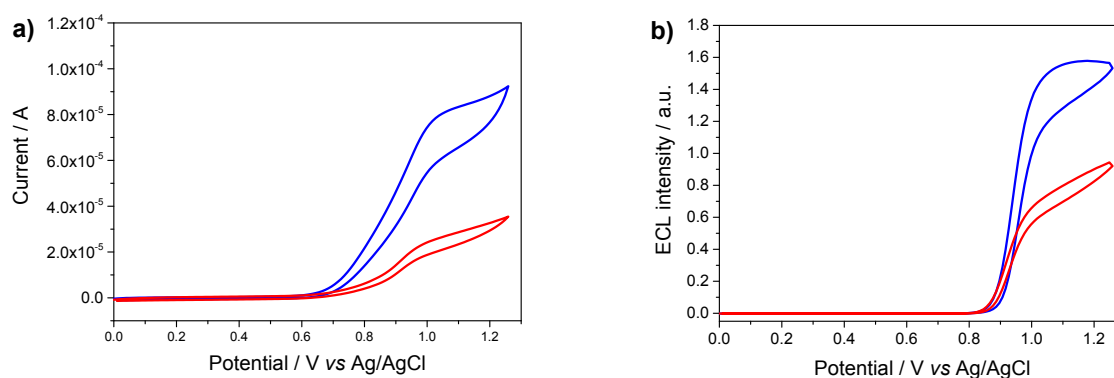

Figure S3. Voltammetric and ECL signals of a pNIPAM-modified GC electrodes recorded in a 100 mM PBS (pH7.4) solution containing  $0.5 \text{ mM Ru}(\text{bpy})_3^{2+}$  and 100 mM TPA at  $25^\circ\text{C}$  (red curve) and at  $40^\circ\text{C}$  (blue curve). The film were prepared as in Figure S1 but without  $\text{Ru}(\text{bpy})_3$  monomer in the electrodeposition solution.

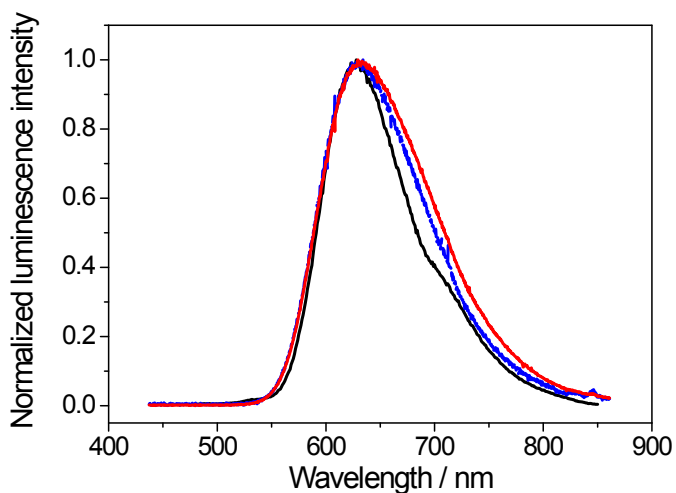

Figure S4. ECL spectra of the pNIPAM-Ru hydrogel film in the swollen state at 25°C (blue curve) and in the collapsed state at 40°C (red curve). Comparison with the photoluminescent spectrum (black curve) of the 10  $\mu\text{M}$   $\text{Ru}(\text{bpy})_3^{2+}$  complex in aqueous solution at 25°C. ECL spectra were acquired in 100 mM PBS solution (pH 7.4) containing 100 mM TPA during cyclic voltammetry experiments. The potential was scanned from 0.2 V to 1.45 V at a scan rate of 50  $\text{mV s}^{-1}$ .

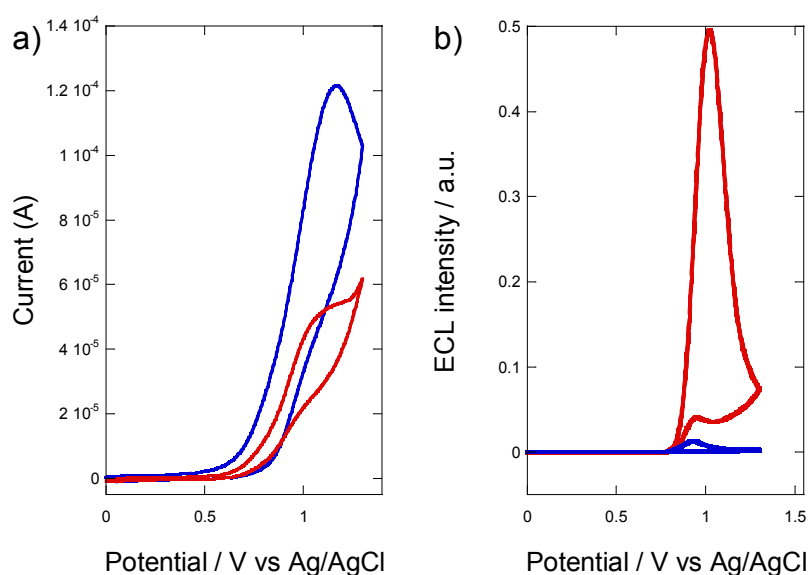

Figure S5. Voltammetric (a) and ECL signal (b) of a GC electrode modified with a pNIPAM-Ru film in a 100 mM PBS solution containing 20 mM DBAE at 25°C (blue curve) and at 40°C (red curve). Scan rate: 100  $\text{mV s}^{-1}$ .

Table S1. Variations of the faradaic charge ratio and of the ECL signal ratio for different coreactants between 25°C (swollen state) and 40°C (collapsed state).

| Coreactant <sup>(a)</sup> | Faradaic charge at 25°C $Q^{25^\circ\text{C}}$ ( $\mu\text{C}$ ) | Faradaic charge at 40°C $Q^{40^\circ\text{C}}$ ( $\mu\text{C}$ ) | ECL signal at 25°C $I_{ECL}^{25^\circ\text{C}}$ ( $10^3$ a.u.) | ECL signal at 40°C $I_{ECL}^{40^\circ\text{C}}$ ( $10^3$ a.u.) | Faradaic charge ratio $Q^{40^\circ\text{C}} / Q^{25^\circ\text{C}}$ | ECL signal ratio $I_{ECL}^{40^\circ\text{C}} / I_{ECL}^{25^\circ\text{C}}$ |
|---------------------------|------------------------------------------------------------------|------------------------------------------------------------------|----------------------------------------------------------------|----------------------------------------------------------------|---------------------------------------------------------------------|----------------------------------------------------------------------------|
| TPA                       | 46±3                                                             | 14.3±13                                                          | 5±0.4                                                          | 188±53                                                         | 0.31±0.28                                                           | 38±12                                                                      |
| DBAE                      | 39±2                                                             | 13.7±3                                                           | 1.7±0.07                                                       | 67±3                                                           | 0.31±0.1                                                            | 40±1                                                                       |
| Oxalate                   | 13.7±0.4                                                         | 17.5±0.7                                                         | 2.68±0.07                                                      | 155±4                                                          | 1.28±0.06                                                           | 58±3                                                                       |

## B. Experimental section

### Chemicals.

All the reagents were purchased from Sigma-Aldrich unless otherwise noted. *N*-isopropylacrylamide (NIPAM) was recrystallized from hexane (ICS) and dried under vacuum prior to use. The cross-linker *N,N'*-methylenebis(acrylamide) (BIS) and the initiator potassium persulfate were used as received. Ruthenium(II) (4-vinyl-4'-methyl-2,2'-bipyridine)bis(2,2'-bipyridine)bis(hexafluorophosphate) [Ru(bpy) monomer] was synthesized according to the procedure described by Spiro et al.<sup>1</sup> The coreactants, *n*-tripropylamine (TPA), dibutylaminoethanol (DBAE) and sodium oxalate, were purchased from Sigma Aldrich. De-ionized water, obtained with a Milli-Q system, was used for all synthesis reactions, purification and solution preparation.

### Preparation of electrodes modified with pNIPAM-Ru films

Glassy carbon (GC) electrodes were polished with wet alumina powder on a polishing cloth, and then washed ultrasonically with ethanol and water, respectively. In a typical process, the electrode was immersed in an aqueous solution containing 70 mM NIPAM, 1.75 mM BIS (2.5 mol % against NIPAM), 0.14 mM of Ru(bpy) monomer (0.2 mol % of Ru monomer against NIPAM), and 1.5 mM  $\text{K}_2\text{S}_2\text{O}_8$  in 0.2 M  $\text{KNO}_3$  solution. Prior to electrochemically assisted polymerization, the reaction solution was deoxygenated by bubbling nitrogen gas for 30 min at room temperature. The potential was applied by cycling between -0.35 and -1.35 V at 100 mV  $\text{s}^{-1}$  for 60 cycles. After the polymerization, the electrodes modified with pNIPAM-Ru films were thoroughly washed with double-distilled water to remove the monomers and stored in ultrapure water.

## Characterization of the hydrogel film

### Scanning electron microscopy (SEM)

A flat glassy carbon plate was used as working electrode and modified using the same procedure as described on the macroscopic electrode. After rinsing with distilled water, it was immersed in a water bath and frozen rapidly in liquid nitrogen. After freeze drying, the electrode was sputtered with gold using a sputter-coater (Emitech K550X) and observed in SEM (Hitachi TM3000).

### Electrochemical measurements

Differential pulse voltammetry (DPV) experiments were performed with a  $\mu$ -Autolab Type III and PGSTAT30 electrochemical stations. The three-electrode system consisted in a glassy carbon (GC) electrode as a working electrode, Ag wire as a pseudo-reference and a platinum wire as a counter-electrode. The temperature of the sample was controlled using a thermostatically controlled cell compartment. The measurements were taken under equilibrium conditions after holding the sample for 15 min at the required temperature.

**Electrochemiluminescence.** ECL experiments were performed with a  $\mu$ -Autolab Type III electrochemical station. ECL intensity was measured by using a Hamamatsu photomultiplier tube R4632. The signal was amplified by a Keithley Picoammeter before acquisition *via* the second input channel of the  $\mu$ -Autolab. ECL spectra were recorded using a Princeton Instrument spectrograph Spectra pro 2300i under potential scanning between 0.2 and 1.45 V at a scan rate of 50 mV/s, in an aqueous solution containing the coreactant and the supporting electrolyte. The temperature of the sample was controlled using a thermostatically controlled cell compartment. The measurements were taken under equilibrium conditions after holding the sample for 15 min at each temperature.

## C. References

- 1 P. K. Ghosh and T. G. Spiro, *J. Am. Chem. Soc.*, 1980, **102**, 5543-5549.
